# Supplementary material for: Celastrol Inhibits Canine Mammary Tumor Cells by Inducing Apoptosis via the Caspase Pathway
Source: Front Vet Sci. 2022 Feb 4;8:801407. doi: 10.3389/fvets.2021.801407 (PMC8854749; doi:10.3389/fvets.2021.801407)
Supplement: Supplementary file 2 [file Table_1.XLSX]

## Sheet: CMT-7364
sample name	target name	test	Ct（raw data）	Ct average	2-Ct
CMT-7364 control	β-actin	test 1	21.22	21.40	3.614
			21.59
	β-actin	test 2	19.47	19.33	1.157
			19.18
	β-actin	test 3	20.00	20.02	9.405
			20.04
CMT-7364 0.9 μM celastrol	β-actin	test 1	23.40	23.29	9.75
			23.18
	β-actin	test 2	21.18	21.79	2.758
			22.39
	β-actin	test 3	21.38	21.20	4.151
			21.03
					Through t test analysis of β-actin gene 2-Ct value, there is no significant difference between the control group and the treatment group（p=0.8114）.
sample name	target name	test	Ct（raw data）	Ct average	2-Ct
CIPp control	β-actin	test 1	20.55	20.83	5.365
			21.10
	β-actin	test 2	23.22	23.37	9.224
			23.51
	β-actin	test 3	21.33	21.19	4.18
			21.06
CIPp 0.9 μM celastrol	β-actin	test 1	25.27	25.42	2.227
			25.56
	β-actin	test 2	20.63	20.54	6.559
			20.45
	β-actin	test 3	24.06	24.16	5.335
			24.25
					Through t test analysis of β-actin gene 2-Ct value, there is no significant difference between the control group and the treatment group（p=0.4808）.

## Sheet: CIPp
sample name	target name	test	Ct（raw data）	Ct average	2-Ct
CIPp control	β-actin	test 1	20.55	20.83	5.365
			21.10
	β-actin	test 2	23.22	23.37	9.224
			23.51
	β-actin	test 3	21.33	21.19	4.18
			21.06
CIPp 0.9 μM celastrol	β-actin	test 1	25.27	25.42	2.227
			25.56
	β-actin	test 2	20.63	20.54	6.559
			20.45
	β-actin	test 3	24.06	24.16	5.335
			24.25
					Through t test analysis of β-actin gene 2-Ct value, there is no significant difference between the control group and the treatment group（p=0.4808）.
